# Supplementary material for: Proteome analysis of human substantia nigra in Parkinson's disease
Source: Springer Nature journal article supplement (doi:10.1186/1477-5956-6-8), 2008-01-01
Supplement: Additional file 1 [file 1477-5956-6-8-s1.pdf]

| # | SSP  |   | Name                                                                  | NCBI-<br>Access-Nr. | MW<br>(kd) | pI  | Graph                                                                                 | Ratio |
|---|------|---|-----------------------------------------------------------------------|---------------------|------------|-----|---------------------------------------------------------------------------------------|-------|
| 1 | 1408 | + | Glial fibrillary<br>acidic protein<br>(GFAP)                          | NP_002046           | 49.9       | 5.4 | 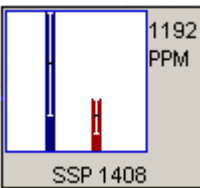   | 2.59  |
| 2 | 2012 | + | galectin 1                                                            | NP_002296           | 15.04      | 5.3 |    | 1.27  |
| 3 | 2013 | + | cellular retinol-<br>binding protein 1,<br>(CRBP1)                    | NP_002890           | 16         | 5.0 |   | 1.76  |
| 4 | 2112 | + | sorcina A                                                             | NP_003121           | 21.4       | 5.3 |  | 1.32  |
| 5 | 2302 | + | annexin V                                                             | NP_001145           | 35.84      | 4.9 |  | 1.32  |
| 6 | 3007 | + | beta tubulin<br>cofactor A                                            | NP_004598           | 12.89      | 5.3 |  | 1.3   |
| 7 | 3020 | + | SH3 domain<br>binding glutamic<br>acid-rich protein<br>like (SH3BGRL) | NP_003013           | 12.76      | 5.2 |  | 1.85  |

|    |      |   |                                           |            |       |     |                                                                                       |      |
|----|------|---|-------------------------------------------|------------|-------|-----|---------------------------------------------------------------------------------------|------|
| 8  | 3022 | + | coactosin-like 1                          | NP_066972  | 16.04 | 5.5 | 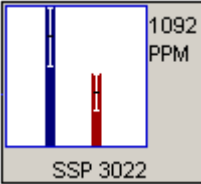   | 2.02 |
| 9  | 3106 | + | glia maturation factor beta (GMFB)        | NP_004115  | 16.87 | 5.2 |    | 1.41 |
| 10 | 3119 | + | ferritin heavy polypeptide 1 (ferritin H) | NP_002023  | 21.38 | 5.3 |    | 1.3  |
| 11 | 3222 | + | glutathione-S-transferase M3              | NP_000840  | 26.87 | 5.4 |   | 1.34 |
| 12 | 4729 | - | V-type ATPase A1                          | NP_001681  | 68.69 | 5.3 |  | 0.67 |
| 13 | 5108 | + | glutathione-S-transferase P1              | AAC13869.1 | 23.4  | 5.7 |  | 1.32 |
| 14 | 7209 | + | glutathione-S-transferase O1              | NP_004823  | 27.83 | 6.2 |  | 1.29 |

|    |      |   |                                     |             |       |     |                                                                                     |      |
|----|------|---|-------------------------------------|-------------|-------|-----|-------------------------------------------------------------------------------------|------|
| 15 | 7520 | + | S-adenosylhomocysteine hydrolase    | NP_000678.1 | 48.27 | 6.0 | 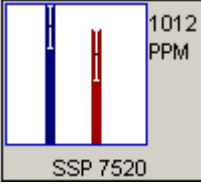 | 1.3  |
| 16 | 8619 | - | Aldehyde dehydrogenase 1A1 (ADH1A1) | NP_000680   | 55.44 | 6.3 |  | 0.75 |
