# Supplementary material for: Proteome analysis of human substantia nigra in Parkinson's disease
Source: Springer Nature journal article supplement (doi:10.1186/1477-5956-6-8), 2008-01-01
Supplement: Additional file 2 [file 1477-5956-6-8-s2.pdf]

| # | SSP    | Name                                                          | NCBI-<br>Access-Nr. | MW<br>(kd) | pI  | Graph                                                                                 | Ratio |
|---|--------|---------------------------------------------------------------|---------------------|------------|-----|---------------------------------------------------------------------------------------|-------|
| 1 | 220 *  | 14-3-3 epsilon                                                | NP_006752           | 29.33      | 4.6 | 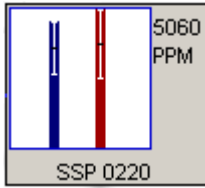   | 0.97  |
| 2 | 1028 * | cytochrome c<br>oxidase 5A<br>(COX5A)                         | NP_004246           | 16.93      | 6.3 |    | 0.98  |
| 3 | 1704   | neurofilament L                                               | NP_006149           | 61.56      | 4.6 |    | 1.12  |
| 4 | 2102   | glyoxalase 1                                                  | NP_006699           | 20.9       | 5.1 |  | 1.27  |
| 5 | 2107   | Apolipoprotein D<br>(ApoD)                                    | NP_001638           | 21.54      | 5.1 |  | 1.33  |
| 6 | 2214 * | rho GDP<br>dissociation<br>inhibitor alpha (rho<br>GDI alpha) | NP_004300           | 23.25      | 5.0 |  | 1.08  |
| 7 | 2315   | crystallin Mu 1                                               | NP_001879           | 33.93      | 5.1 |  | 1.23  |

|    |      |   |                                              |           |       |     |                                                                                       |      |
|----|------|---|----------------------------------------------|-----------|-------|-----|---------------------------------------------------------------------------------------|------|
| 8  | 4122 |   | ferritin, light polypeptide (ferritin L)     | NP_000137 | 20.10 | 5.5 | 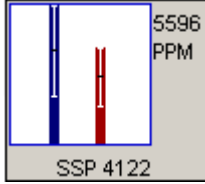   | 1.36 |
| 9  | 4216 | * | ubiquitin hydrolase L1 (UCH-L1)              | NP_004172 | 25.15 | 5.3 |    | 1.02 |
| 10 | 4503 |   | actin gamma 1                                | NP_001605 | 41.99 | 5.3 |    | 1.12 |
| 11 | 5103 |   | peroxiredoxin 2 isoform A                    | NP_005800 | 22.09 | 5.7 |   | 1.1  |
| 12 | 5133 |   | superoxide dismutase 1 (SOD1)                | NP_000445 | 15.88 | 5.7 |  | 1.11 |
| 13 | 5507 |   | creatine kinase B                            | NP_001814 | 42.96 | 5.3 |  | 1.19 |
| 14 | 5621 | * | human collapsin response mediator 2 (hCRMP2) | NP_001377 | 62.84 | 6.0 |  | 0.92 |

|    |      |   |                                                    |             |       |     |                                                                                       |      |
|----|------|---|----------------------------------------------------|-------------|-------|-----|---------------------------------------------------------------------------------------|------|
| 15 | 6304 | * | lactate dehydrogenase B (LDH-B)                    | NP_002291   | 36.84 | 5.7 | 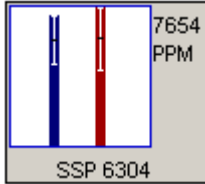   | 1    |
| 16 | 6608 | * | disulfide isomerase ER60                           | NP_005304   | 57.16 | 2.4 |    | 1.02 |
| 17 | 7113 | * | DJ-1                                               | NP_009193   | 20.04 | 6.3 |    | 0.94 |
| 18 | 7115 | * | glutathione-S-transferase M2                       | NP_000839.1 | 25.9  | 6.0 |   | 0.98 |
| 19 | 7531 | * | rab GDP dissociation inhibitor beta (rab GDI beta) | NP_001485   | 51.10 | 6.1 |  | 1.05 |
| 20 | 8204 | * | peroxiredoxin 6                                    | NP_004896   | 25.10 | 6.0 |  | 1.05 |
| 21 | 8427 | * | glutamine synthetase                               | NP_002056   | 42.91 | 6.4 |  | 1.03 |
